# Supplementary material for: 2-Phenylpyridine Derivatives: Synthesis and Insecticidal Activity against Mythimna separata, Aphis craccivora, and Tetranychus cinnabarinus
Source: MDPI journal article supplement (doi:10.3390/molecules28041567), 2023-02-06
Supplement: s1 [file s1]

Article

# Synthesis and insecticidal agents of 2-phenylpyridine compounds containing N-phenylbenzamide moieties

Wenliang Zhang, Jingjing Chen and Xiaohua Du

Catalytic Hydrogenation Research Center, Zhejiang Key Laboratory of Green Pesticides and Cleaner Production Technology, Zhejiang Green Pesticide Collaborative Innovation Center, Zhejiang University of Technology, Hangzhou 310014, P. R. China

\* Correspondence: duxiaohua@zjut.edu.cn (X.-H.D.)

## Supporting Information

## Contents

1.  $^1\text{H}$  NMR spectra and  $^{13}\text{C}$  NMR spectra of target compounds 5a-5k ..... 2

## 2. $^1\text{H}$ NMR spectra and $^{13}\text{C}$ NMR spectra of target compounds 5a-5k

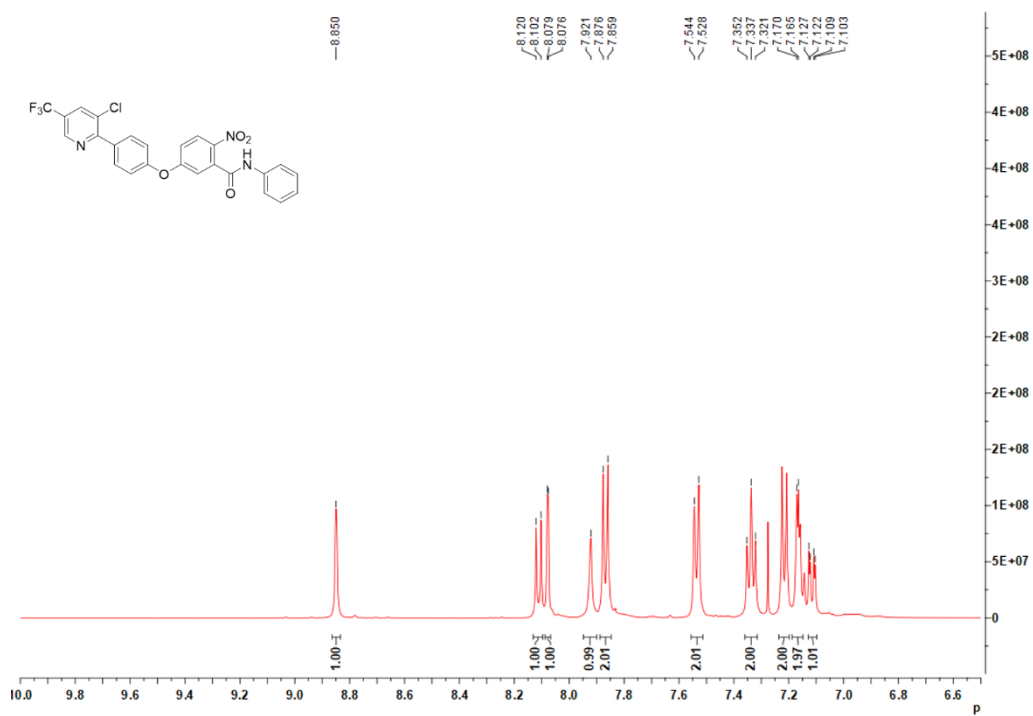

Figure S1. The  $^1\text{H}$  NMR spectrum of 5a.

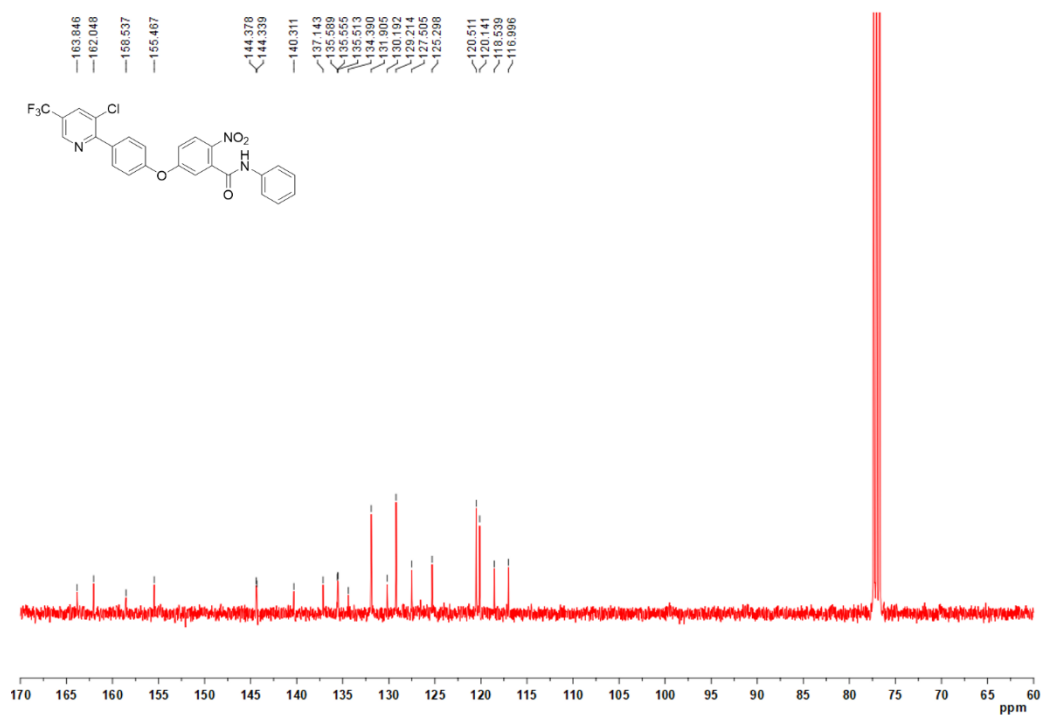

Figure S2. The  $^{13}\text{C}$  NMR spectrum of 5a.

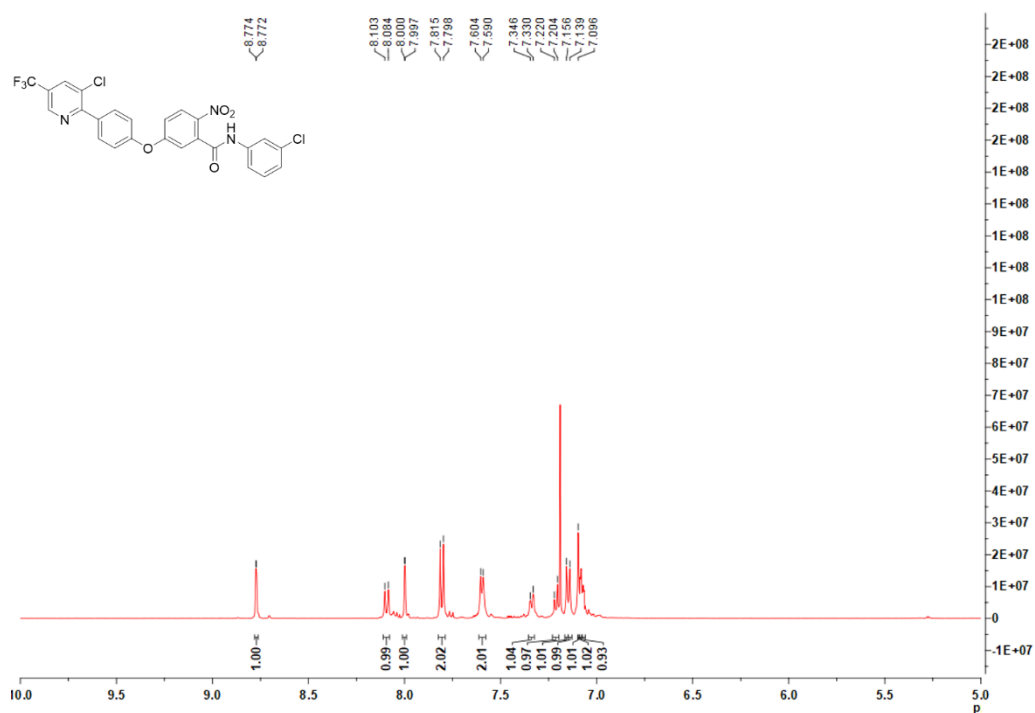

Figure S3. The <sup>1</sup>H NMR spectrum of **5b**.

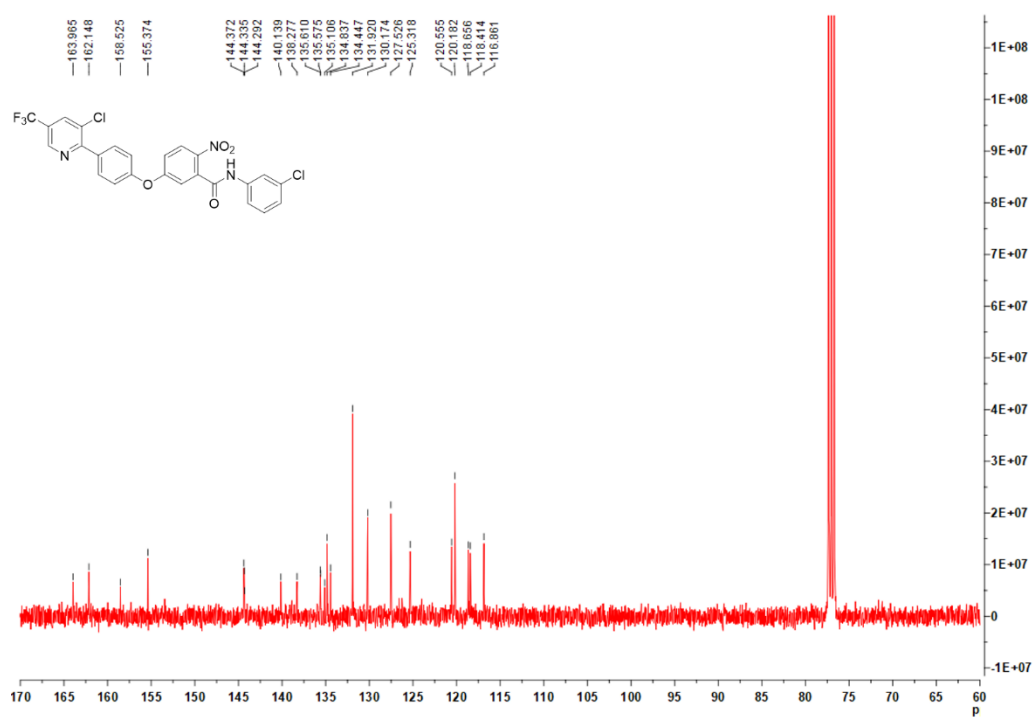

Figure S4. The <sup>13</sup>C NMR spectrum of **5b**.

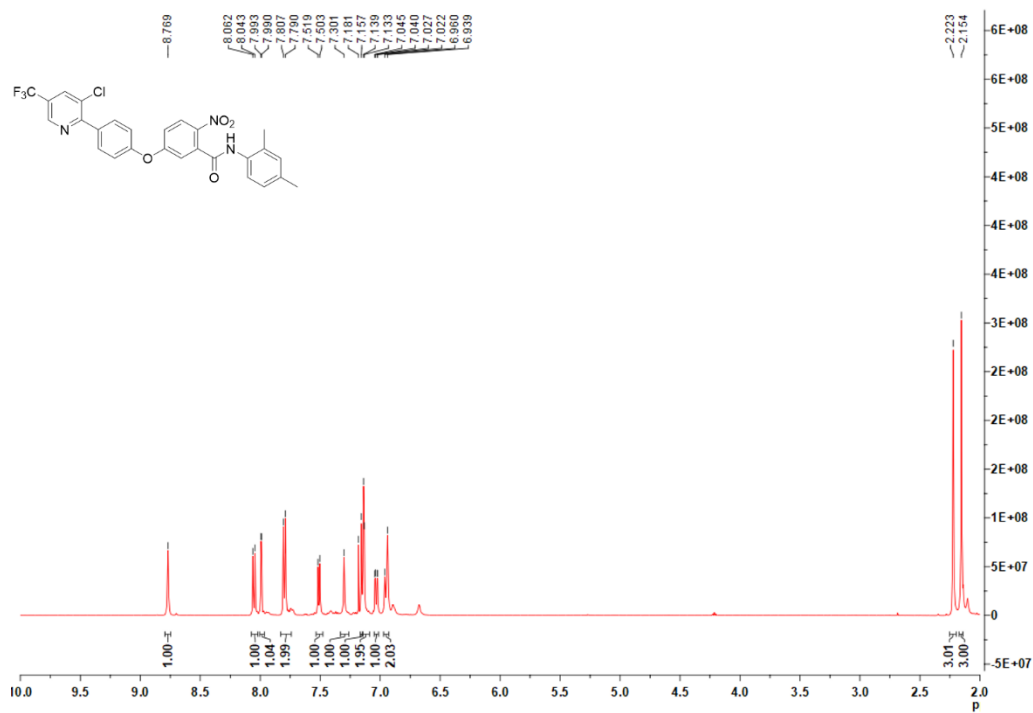

Figure S5. The <sup>1</sup>H NMR spectrum of 5c.

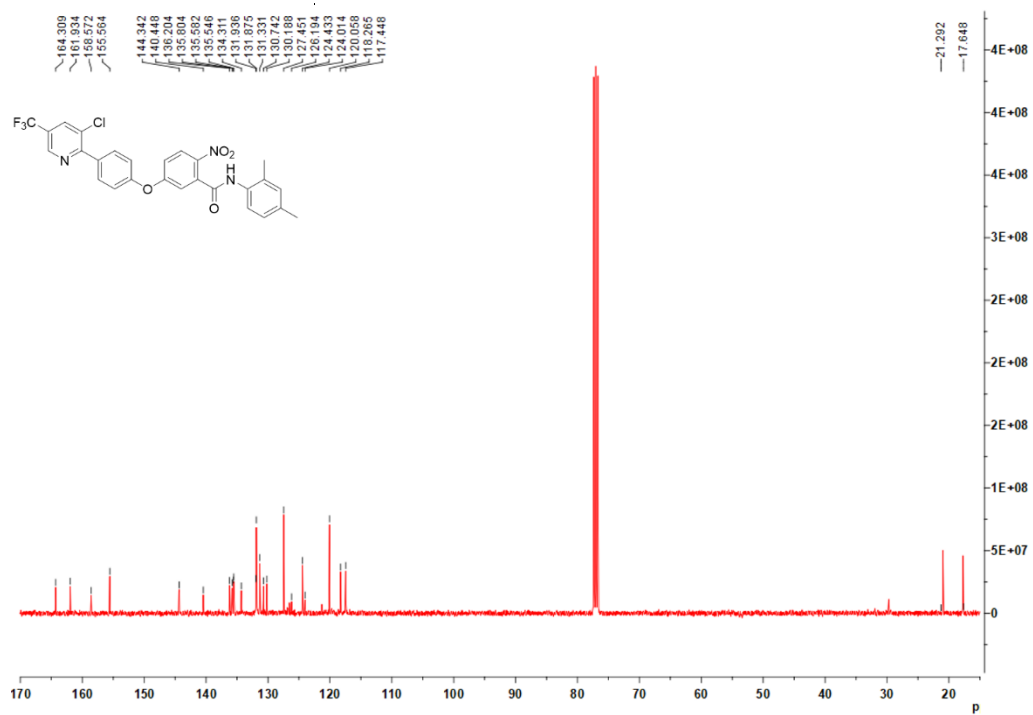

Figure S6. The <sup>13</sup>C NMR spectrum of 5c.

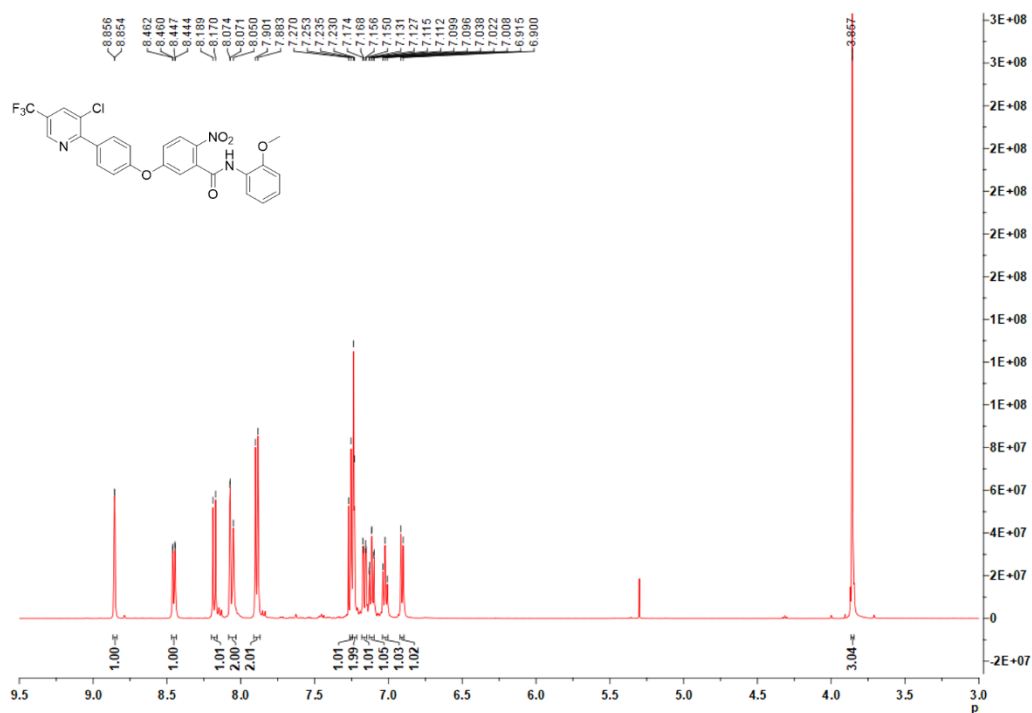

Figure S7. The <sup>1</sup>H NMR spectrum of 5d.

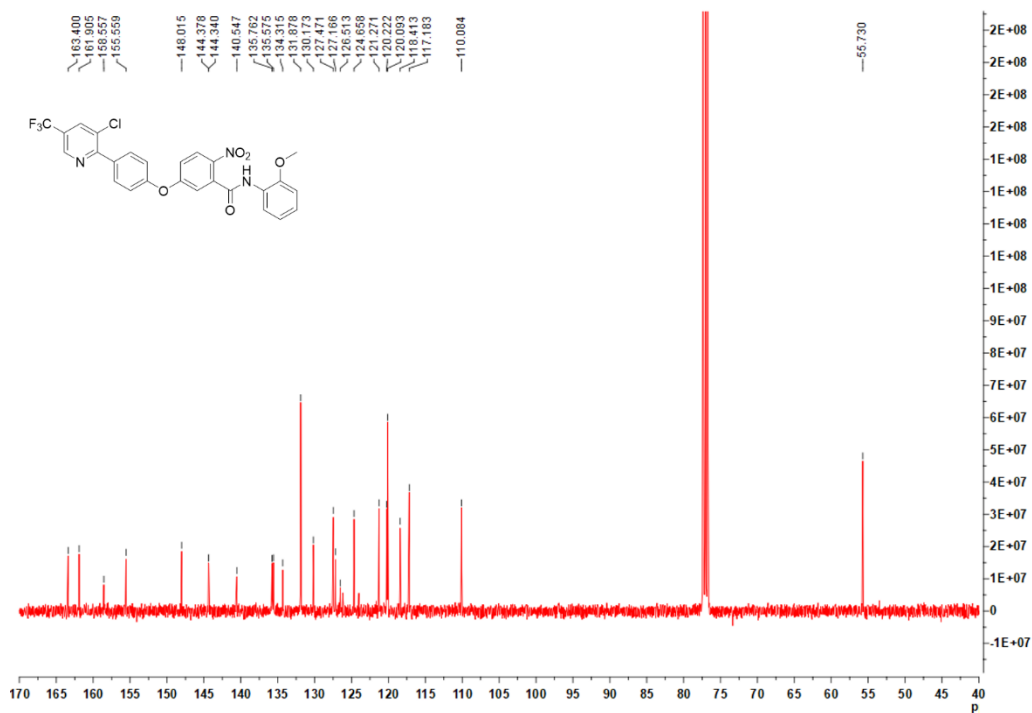

Figure S8. The <sup>13</sup>C NMR spectrum of 5d.

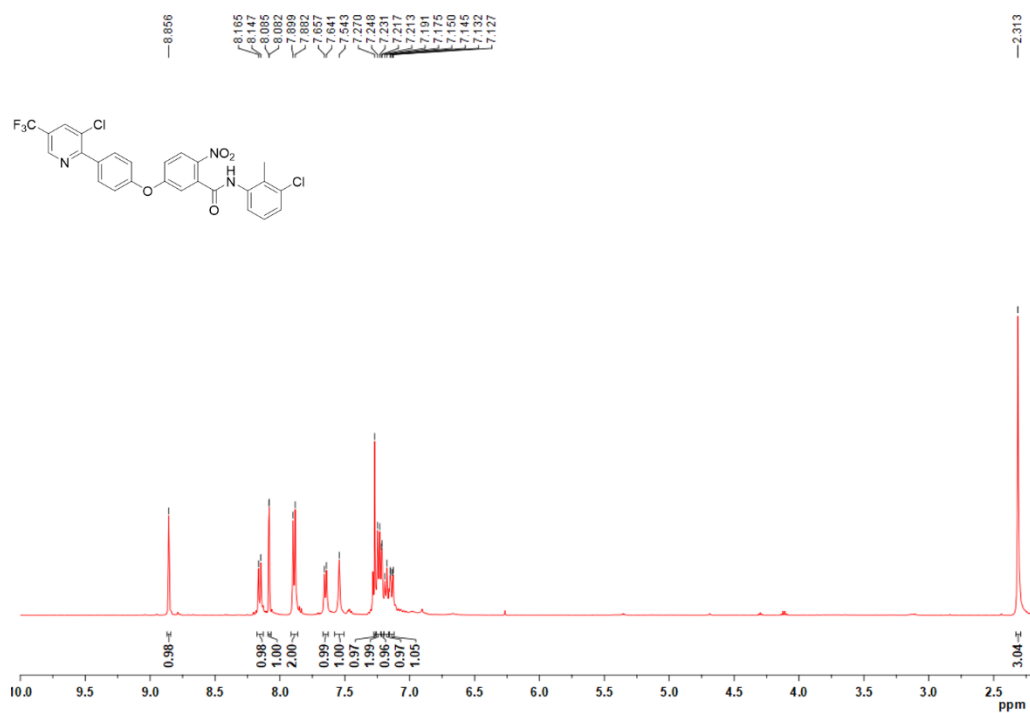

Figure S9. The <sup>1</sup>H NMR spectrum of **5e**.

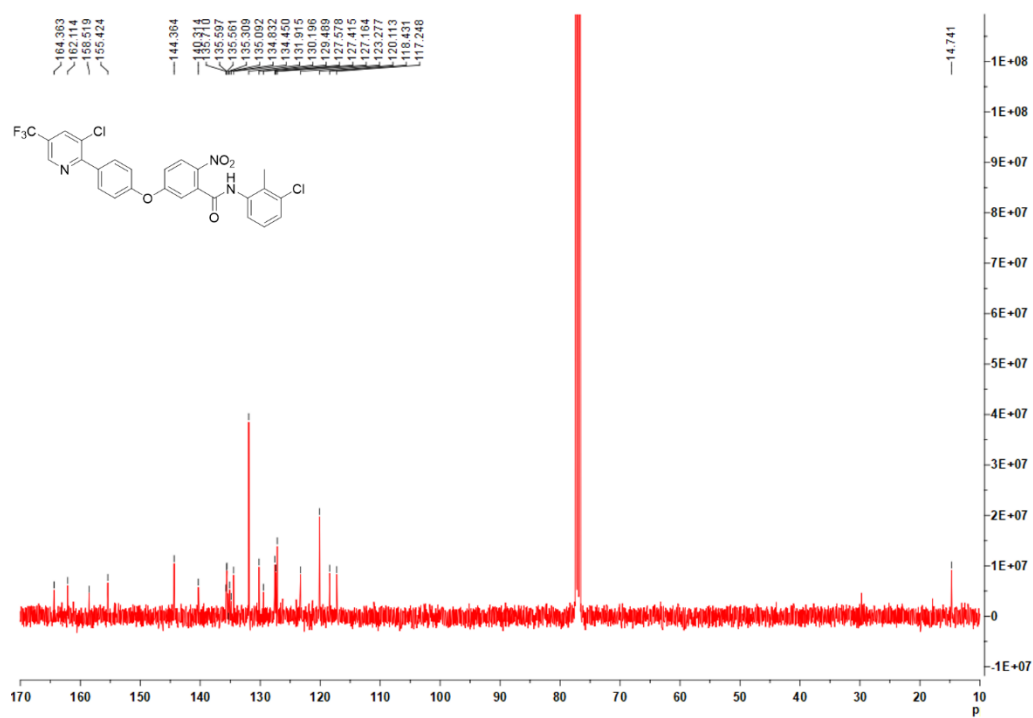

Figure S10. The <sup>13</sup>C NMR spectrum of **5e**.

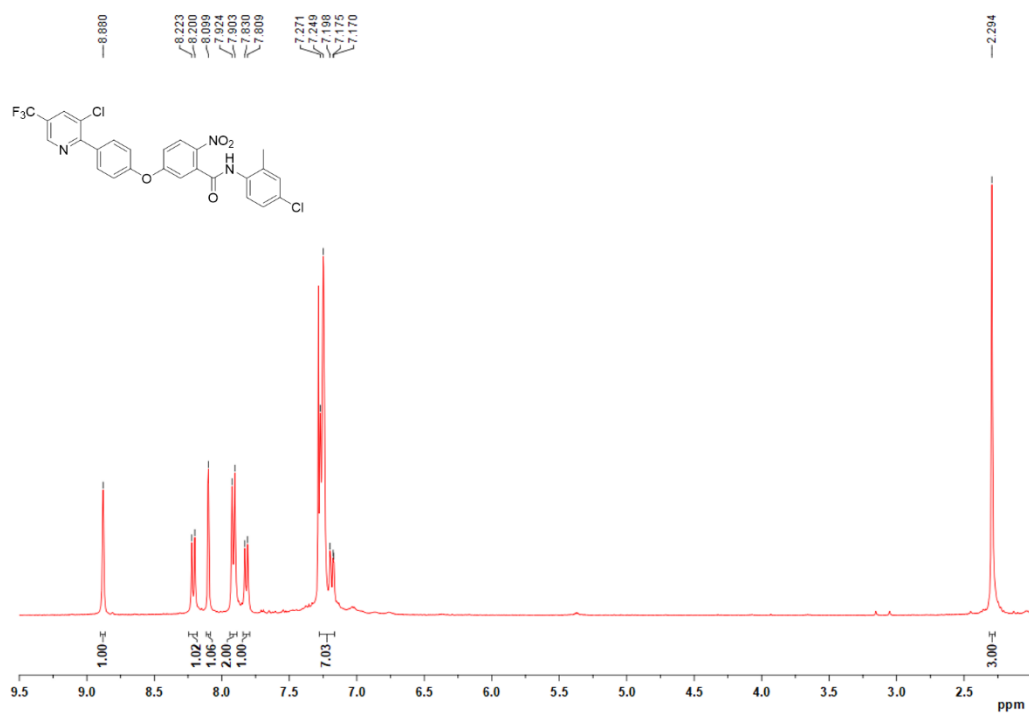

Figure S11. The <sup>1</sup>H NMR spectrum of 5f.

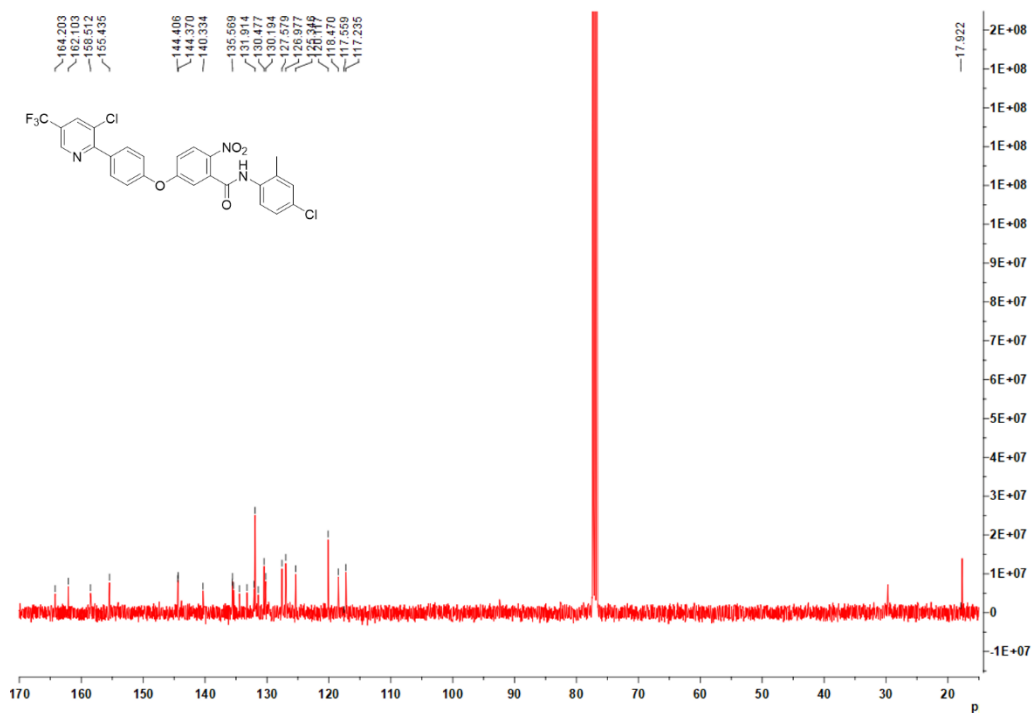

Figure S12. The <sup>13</sup>C NMR spectrum of 5f.

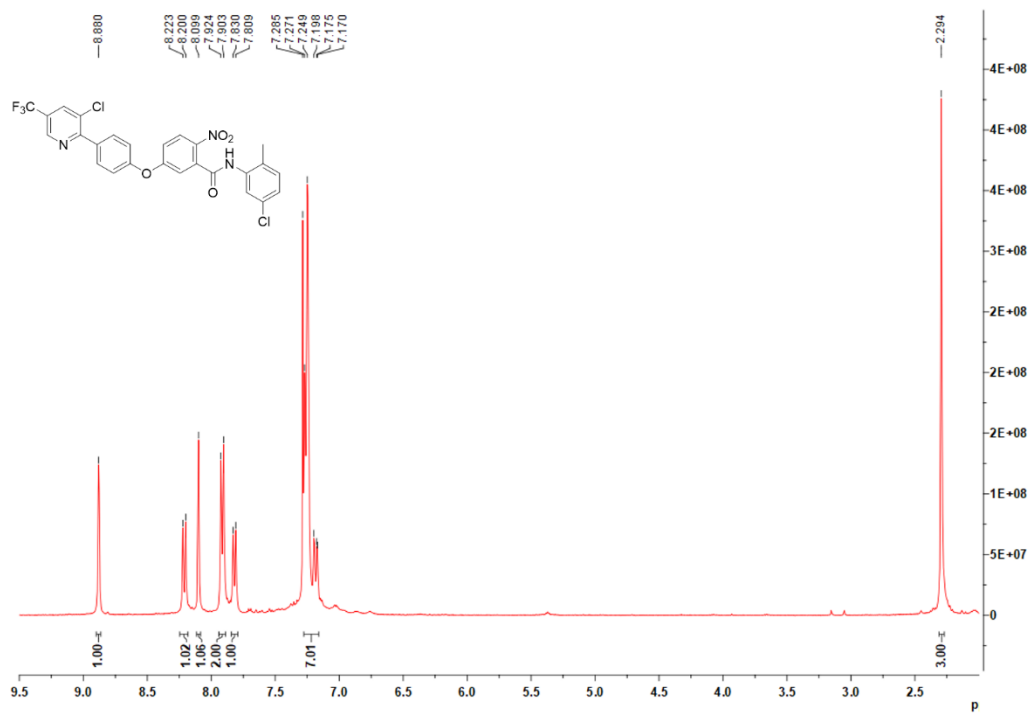

Figure S13. The <sup>1</sup>H NMR spectrum of **5g**.

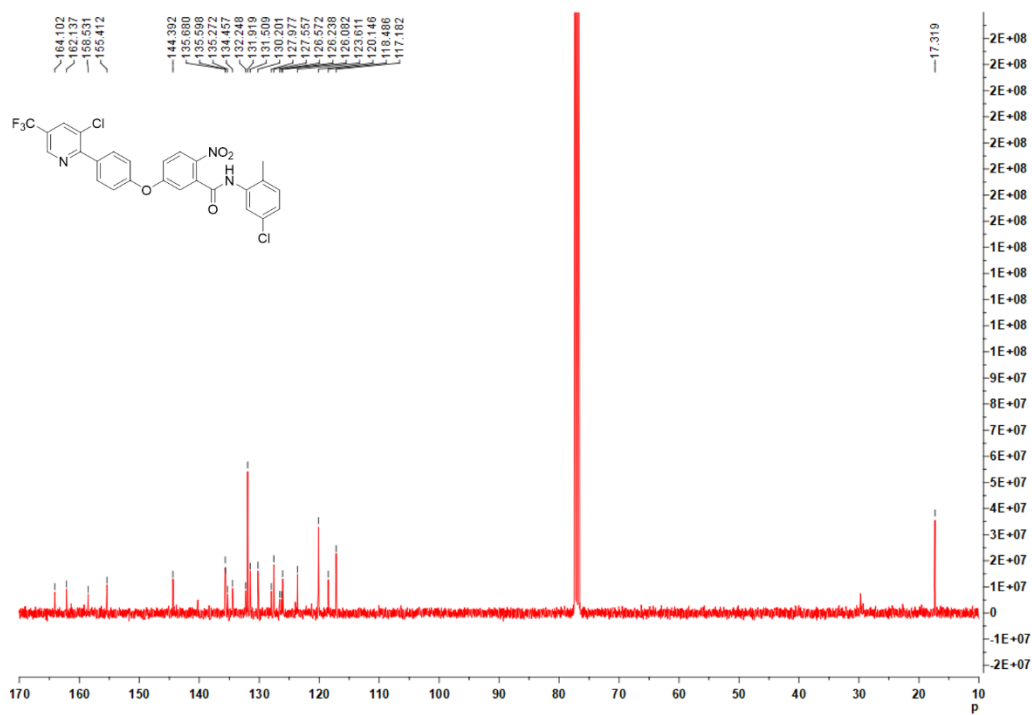

Figure S14. The <sup>13</sup>C NMR spectrum of **5g**.





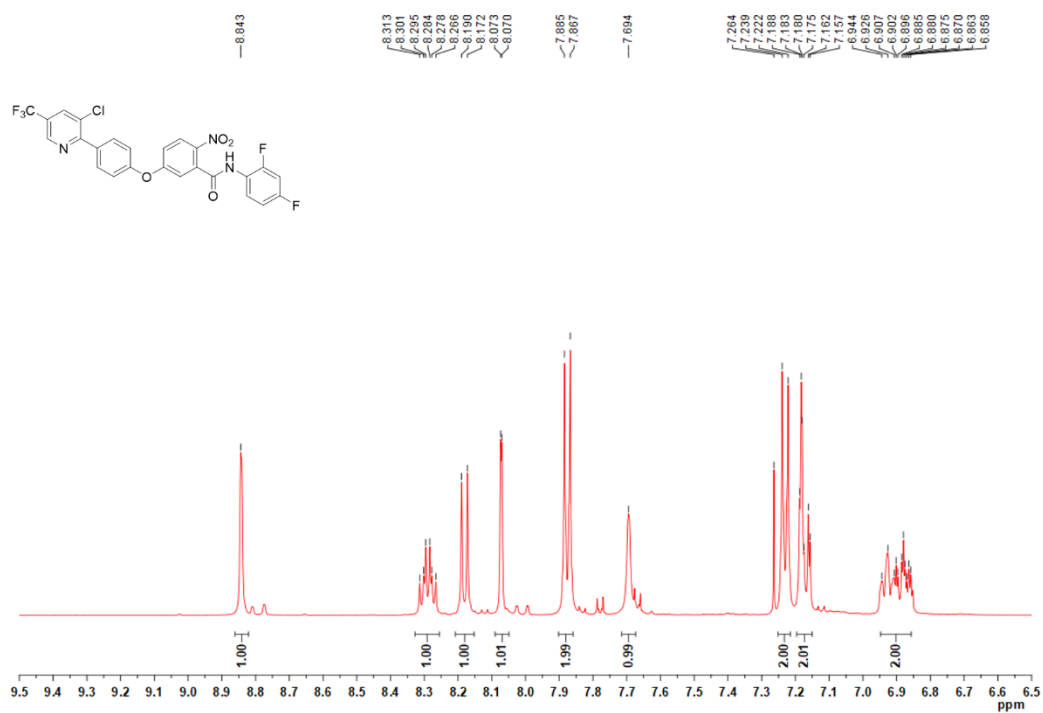

Figure S17. The <sup>1</sup>H NMR spectrum of **5i**.

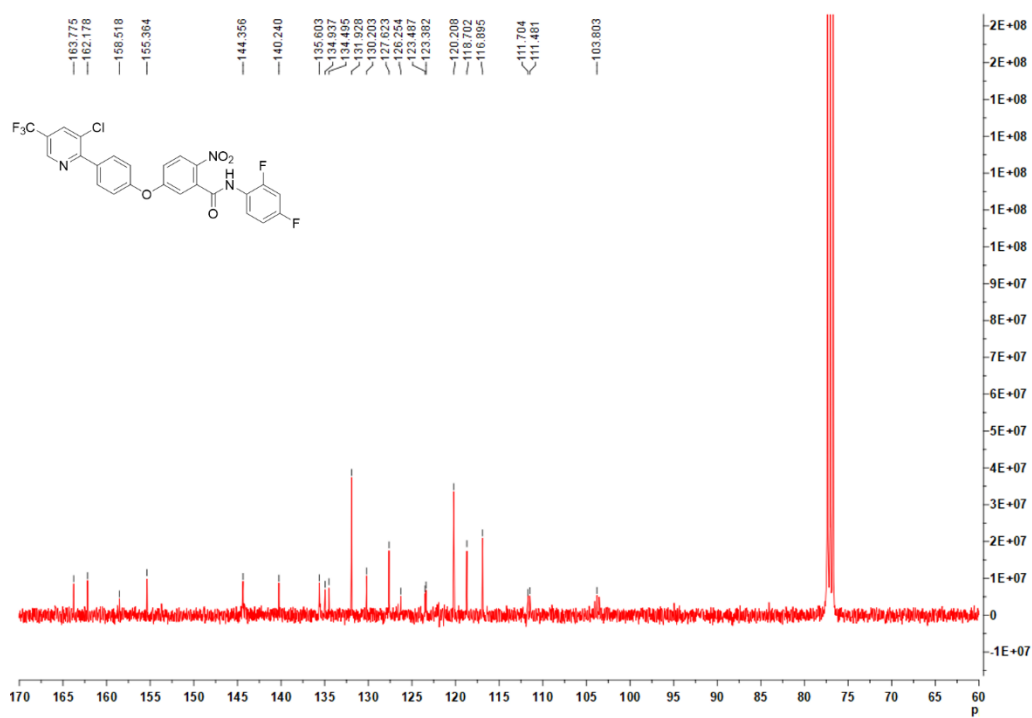

Figure S18. The <sup>13</sup>C NMR spectrum of **5i**.

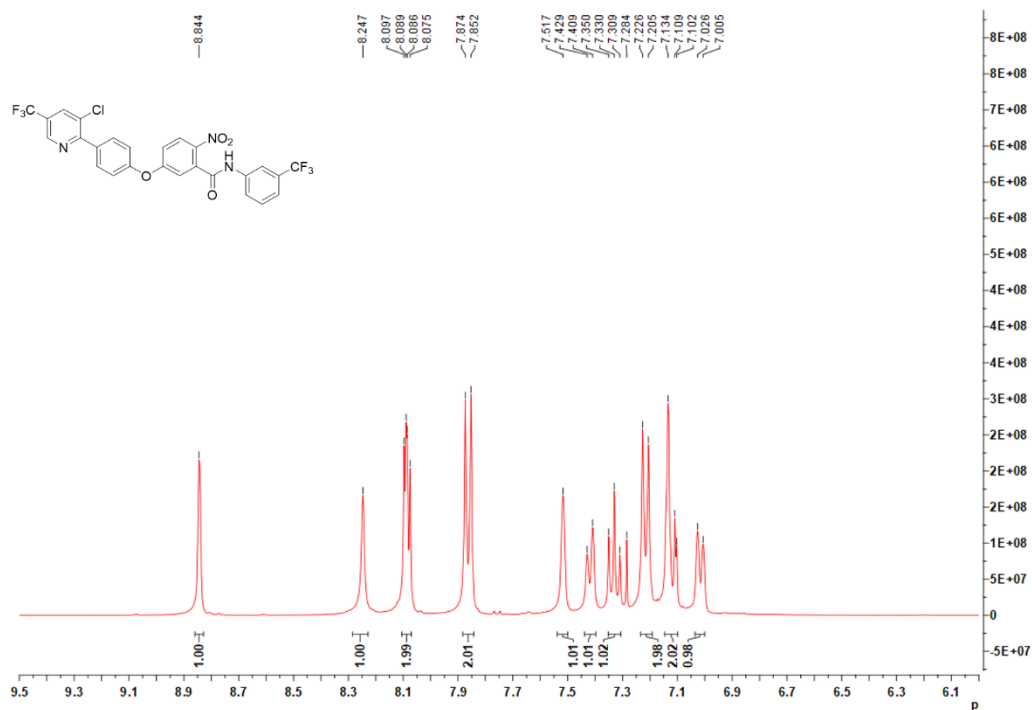

Figure S19. The <sup>1</sup>H NMR spectrum of 5j.

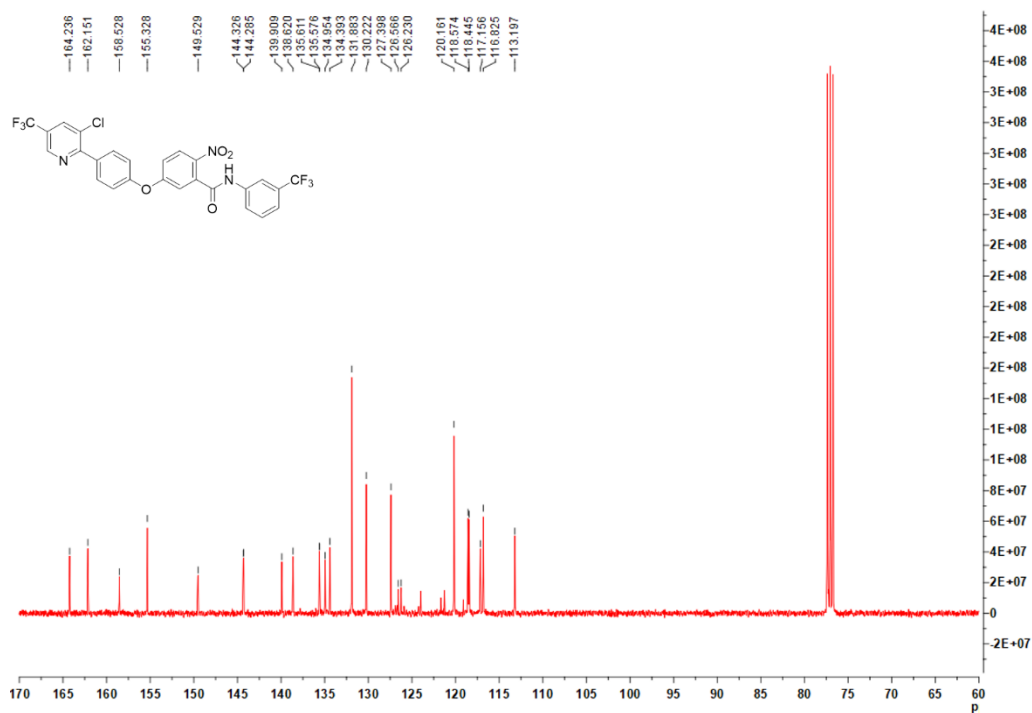

Figure S20. The <sup>13</sup>C NMR spectrum of 5j.

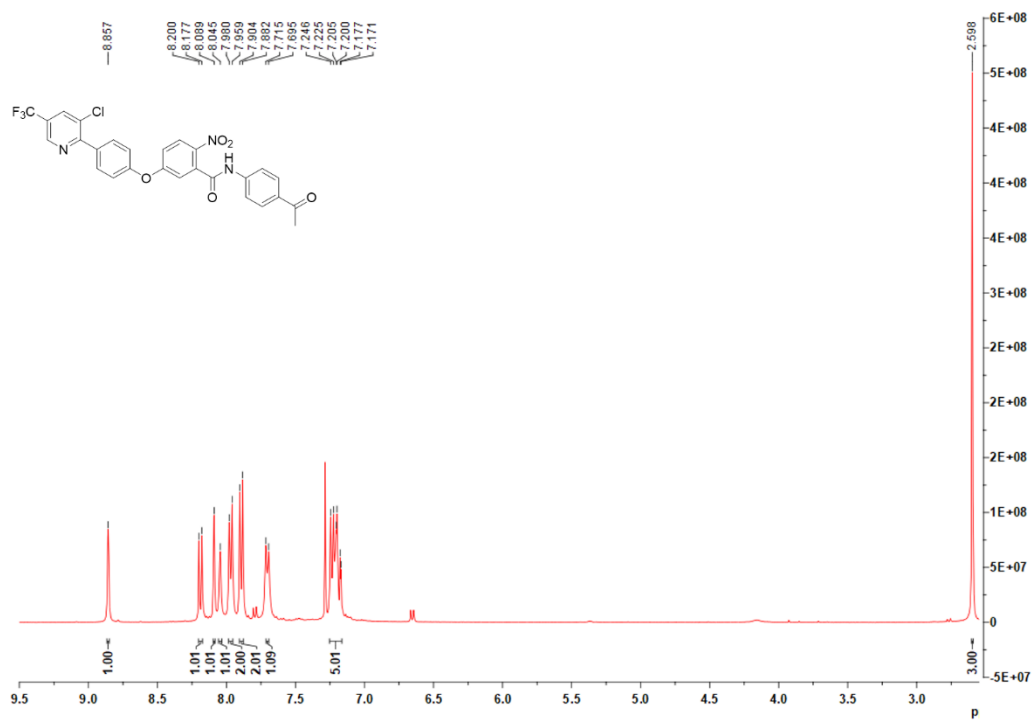

Figure S21. The <sup>1</sup>H NMR spectrum of 5k.

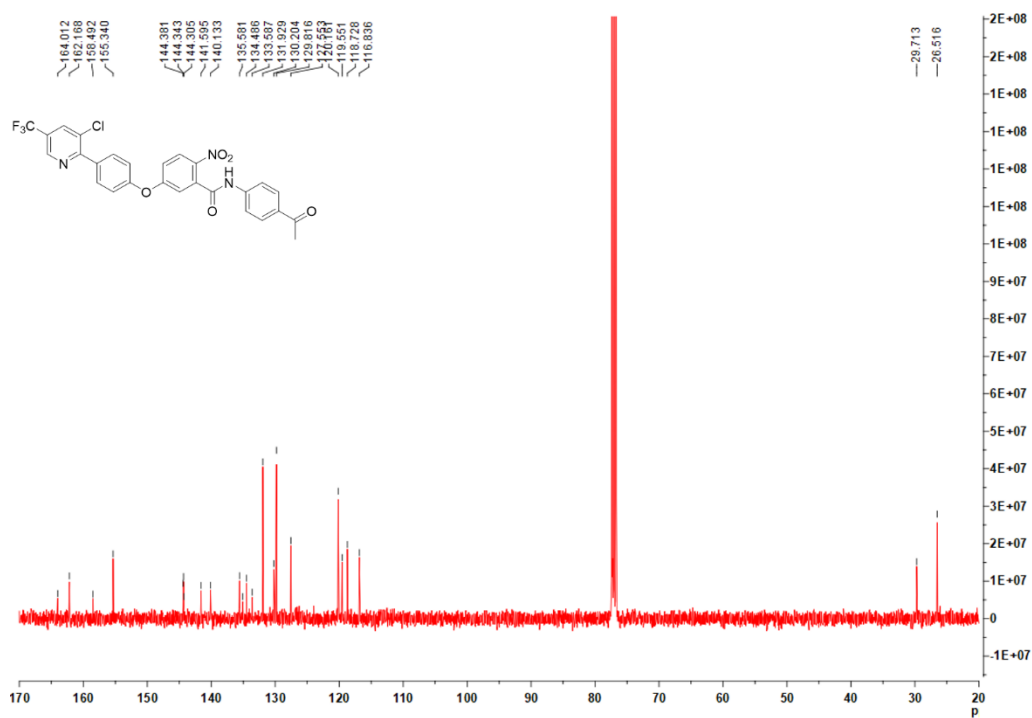

Figure S22. The <sup>13</sup>C NMR spectrum of 5k.
